# Supplementary material
Source: Research Square preprint supplement (doi:10.21203/rs.3.rs-8960615/v1)

qPCR validation of the expression profiles of key genes involved in inflorescence development in Agropyron cristatum.


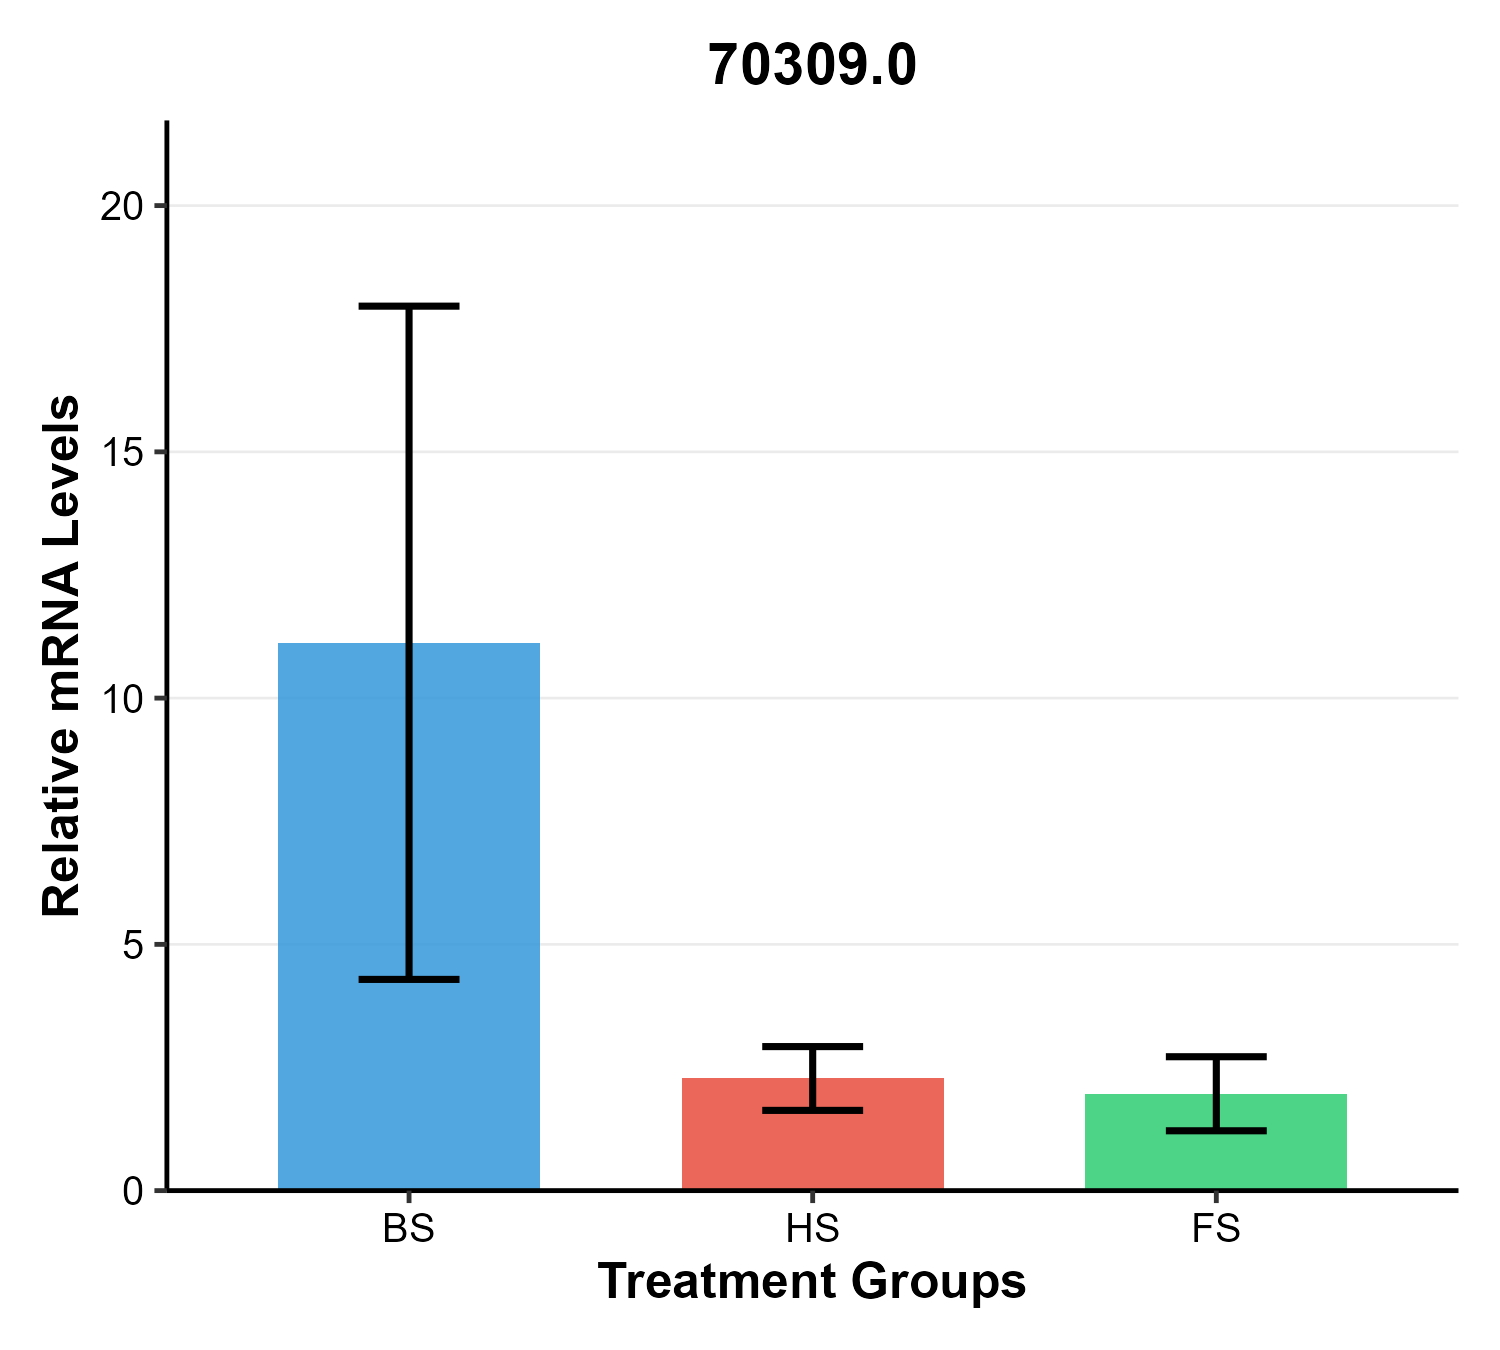

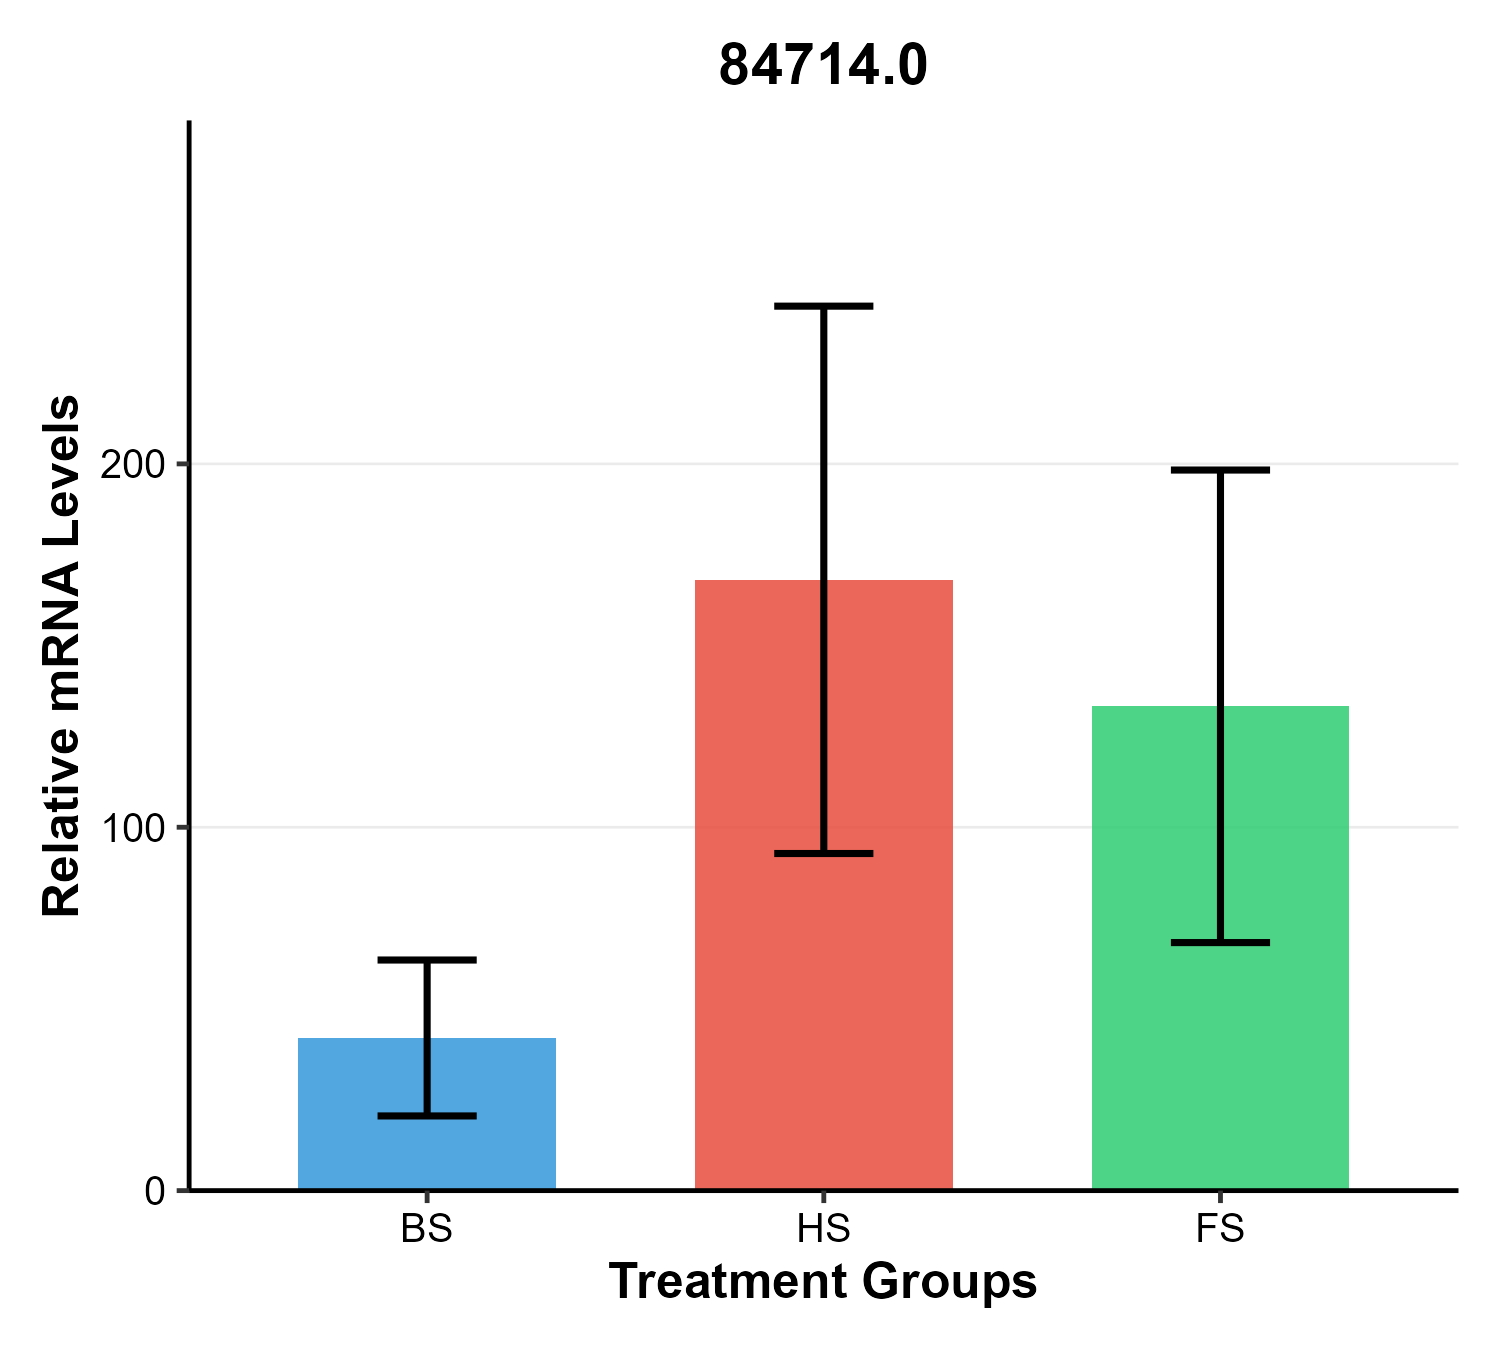

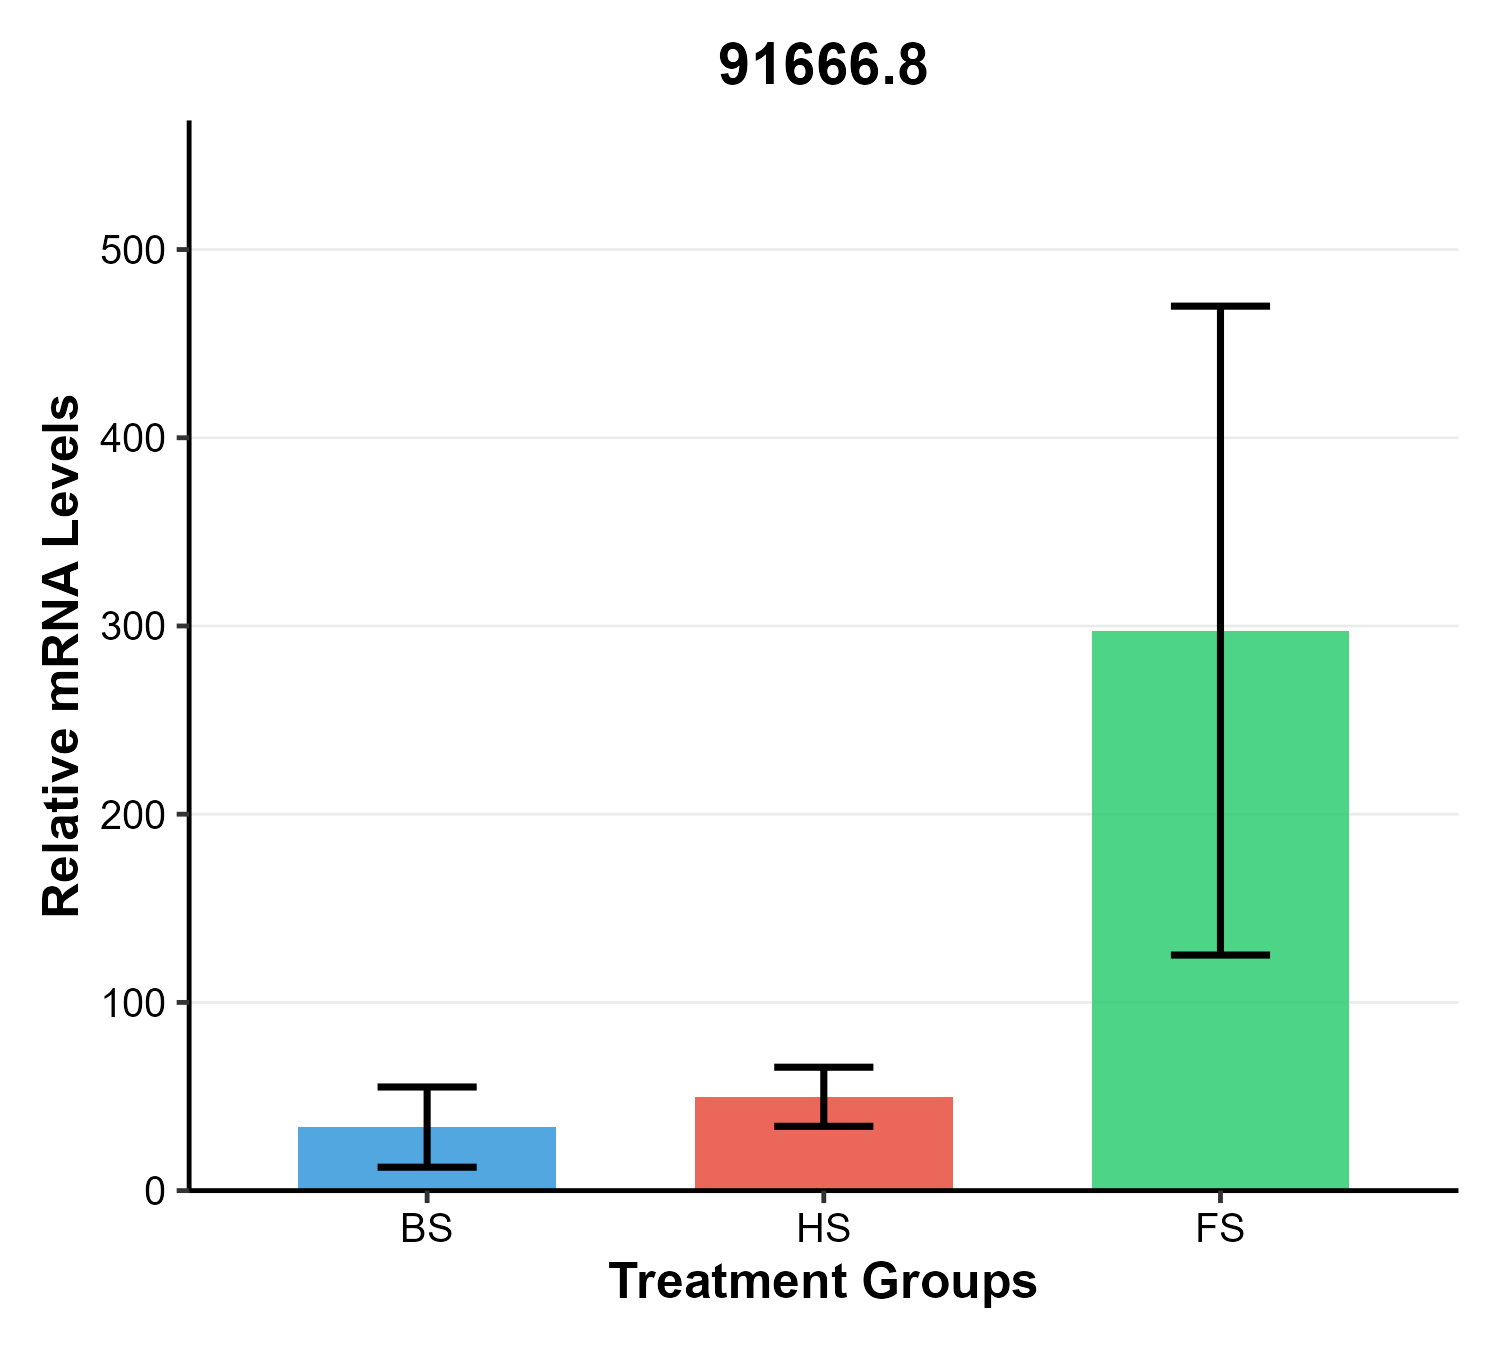

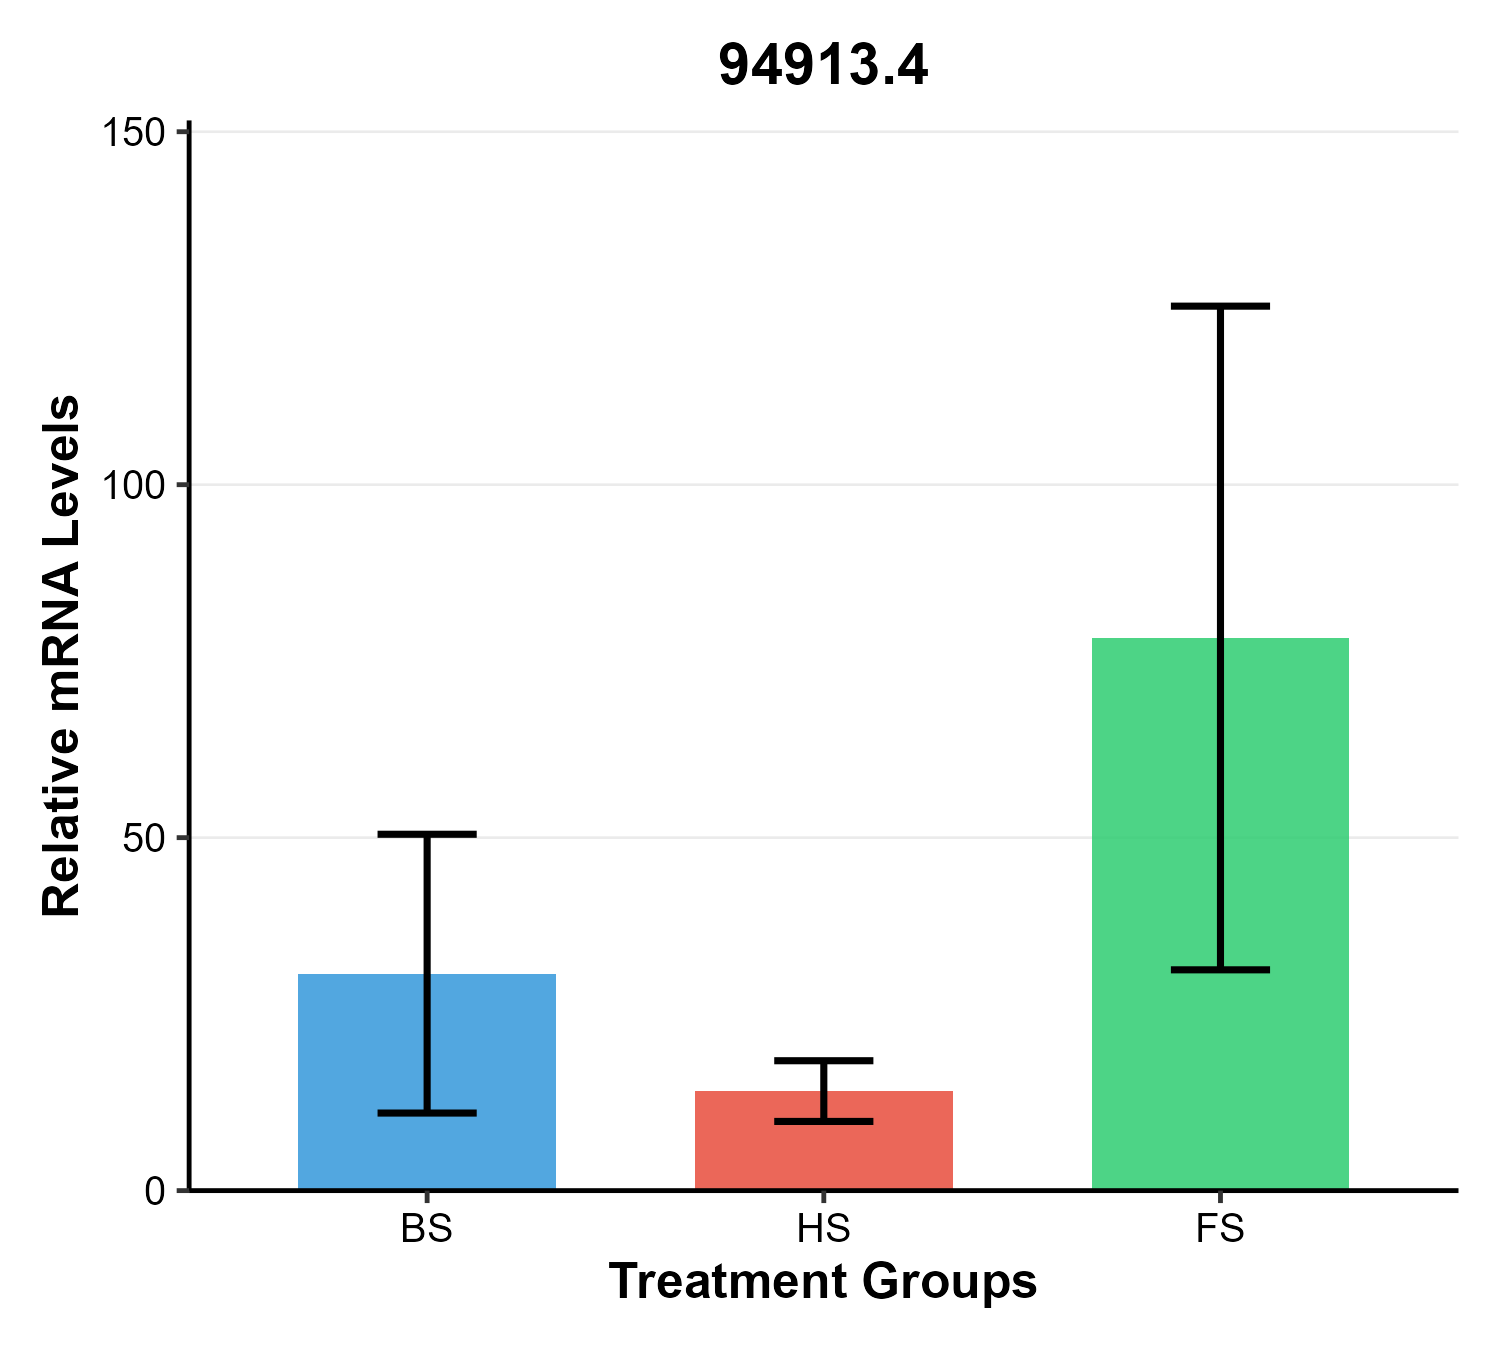

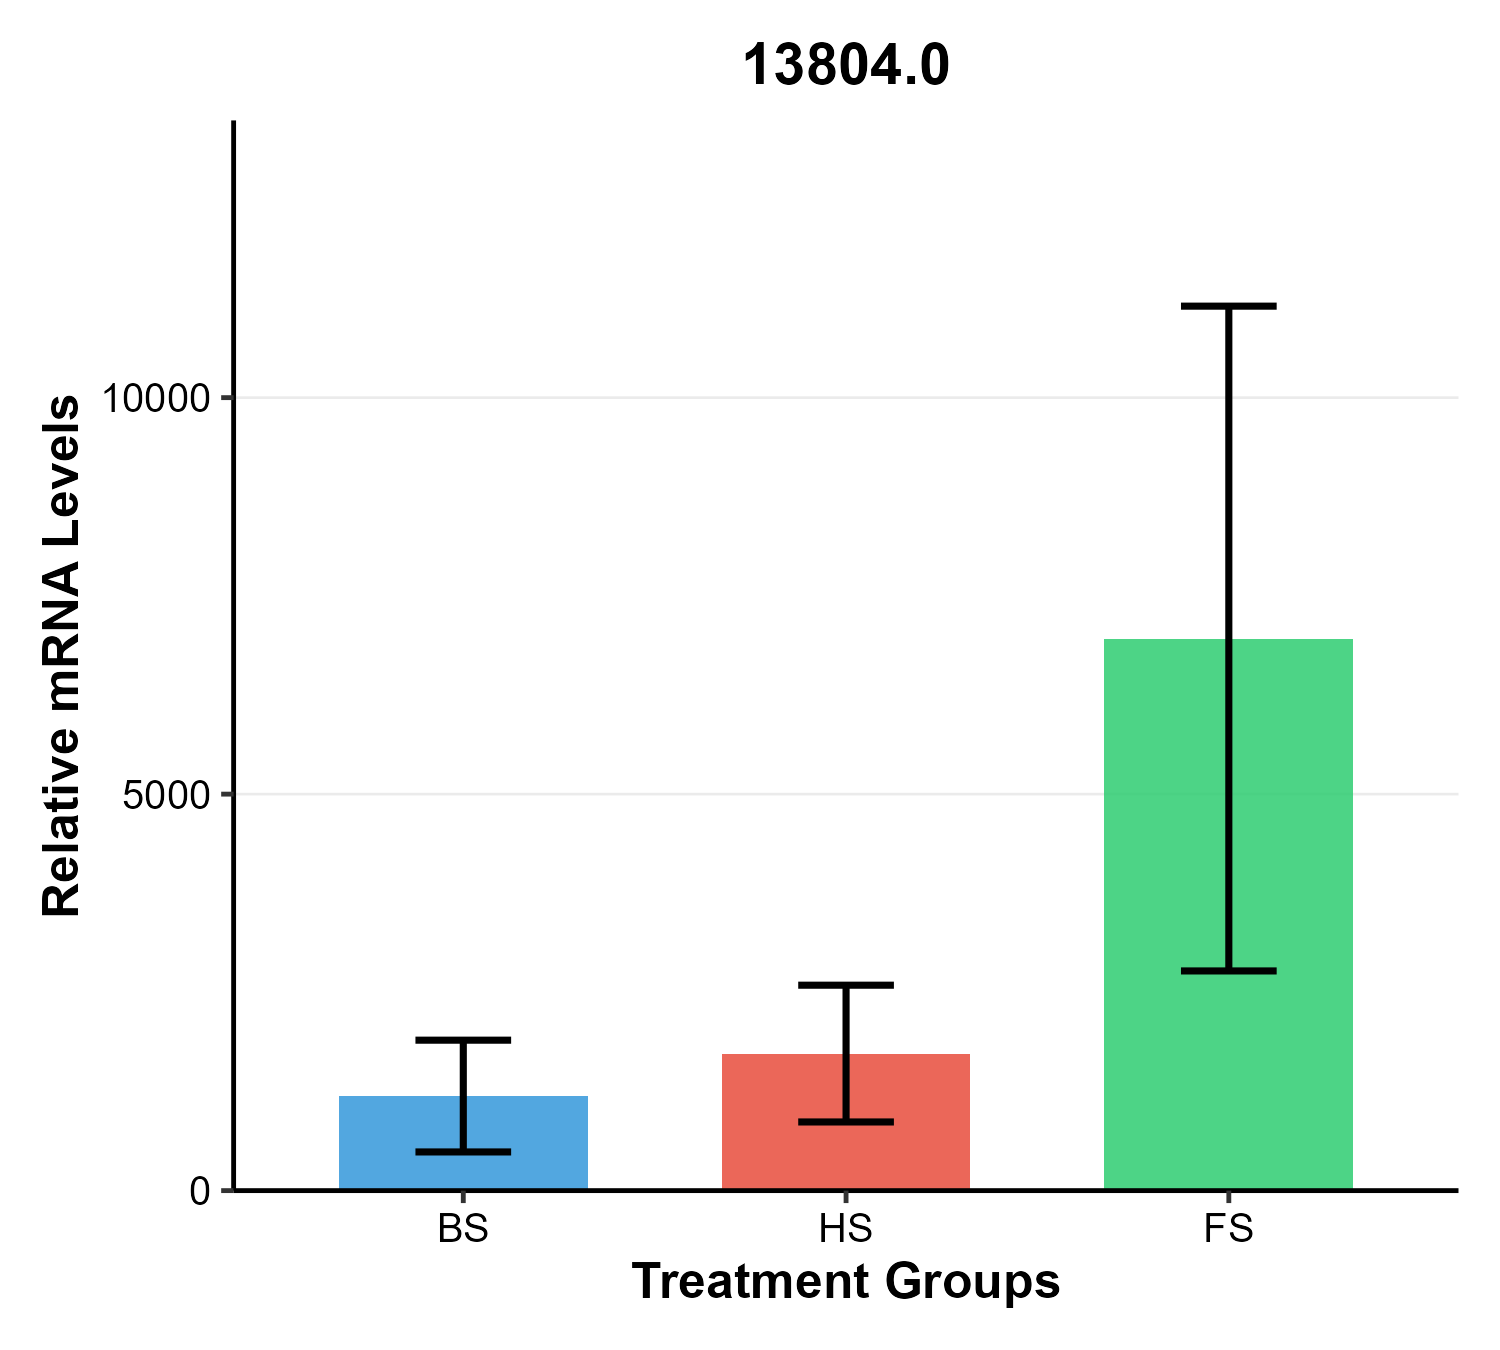

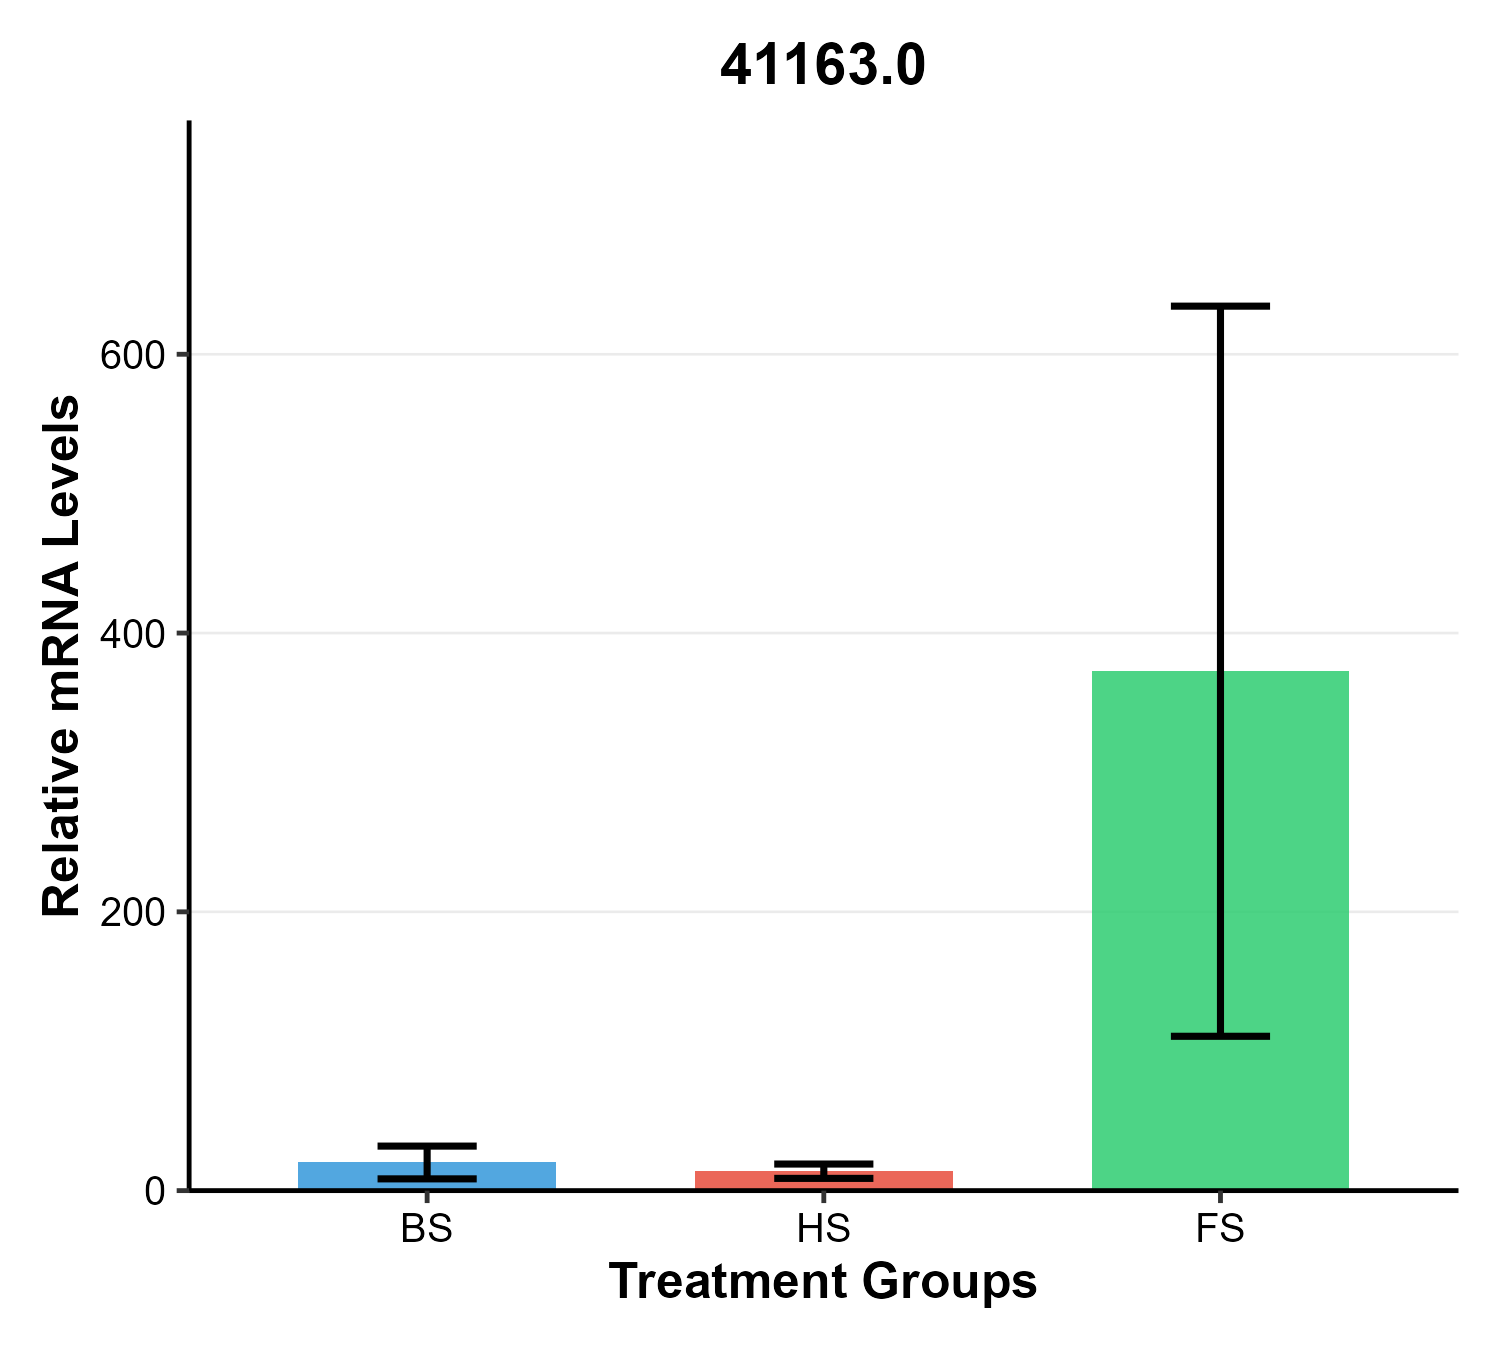

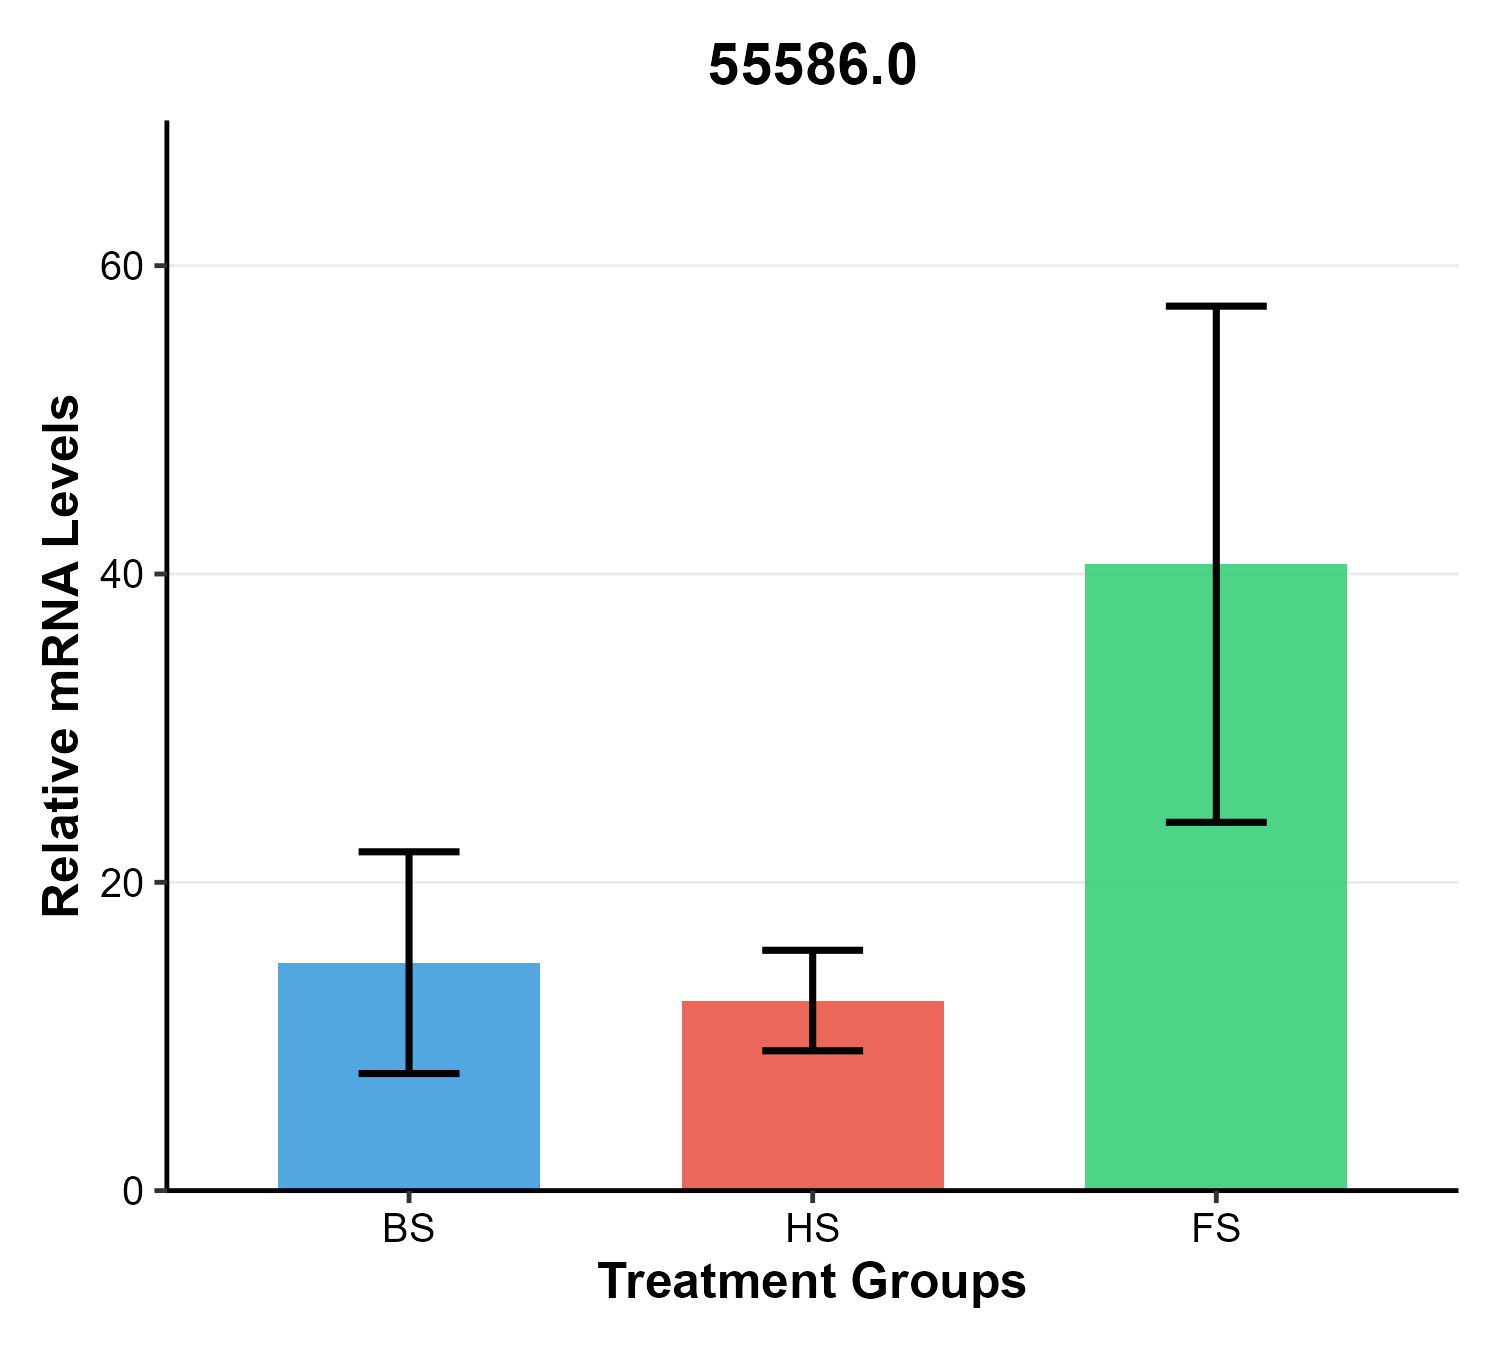

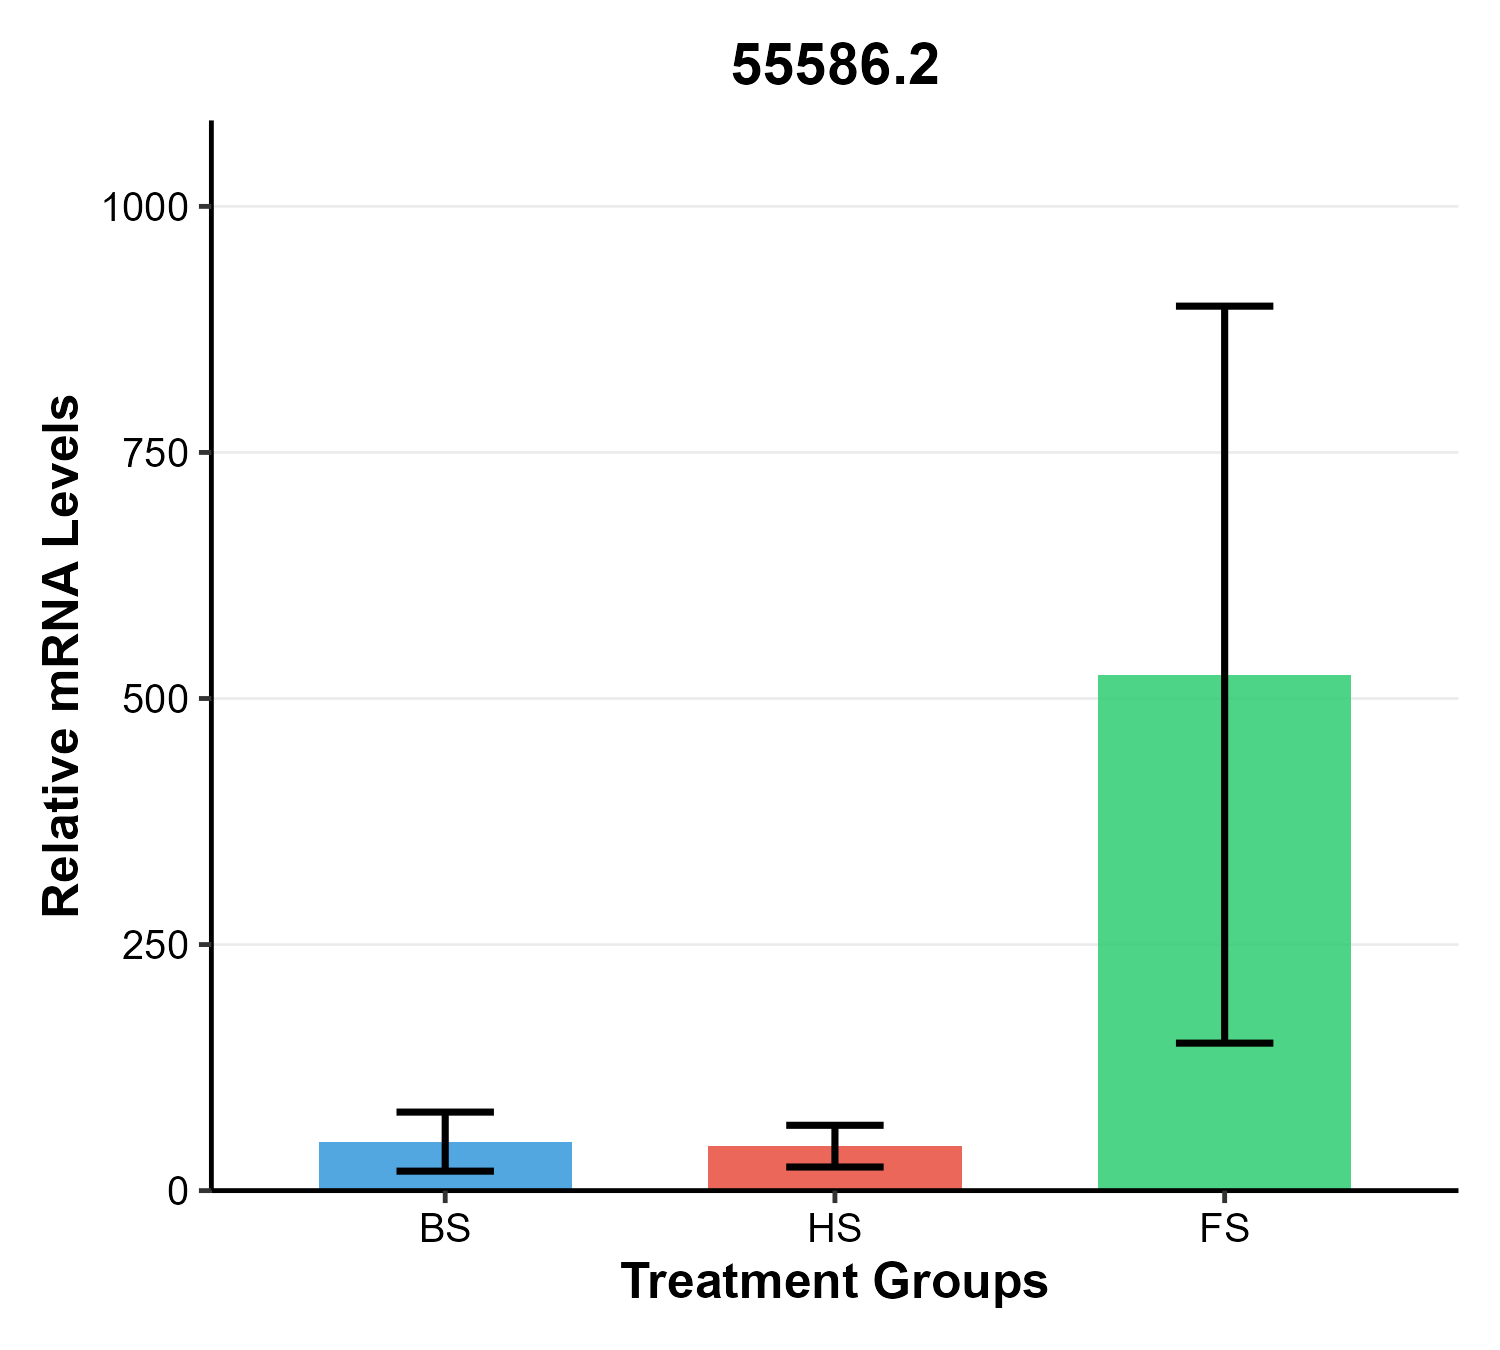

Supplement: Supplementary file 1 [file 2ecba826a75cf5318c245aa8.docx]
